1           **Intensity coded octopaminergic modulation of aversive crawling**  
2           **behavior in *Drosophila melanogaster* larvae**

3  
4           Florian Bilz<sup>1</sup>, Madeleine-Marie Gilles<sup>1</sup>, Adriana Schatton<sup>2</sup>, Hans-Joachim Pflüger<sup>1, #</sup> &  
5           Marco Schubert<sup>1, #</sup>

6  
7  
8           <sup>1</sup>*Department of Biology, Chemistry and Pharmacy, Institute of Biology - Neurobiology, Freie*  
9           *Universität Berlin, Königin-Luise-Strasse 1-3, 14195 Berlin, Germany*

10          <sup>2</sup>*Department of Biology, Chemistry and Pharmacy, Institute of Biology - Animal Behavior, Freie*  
11          *Universität Berlin, Takustrasse 6, 14195 Berlin, Germany*

12          #*Shared senior authorship*

13  
14  
15          **Correspondence:**       Dr. Marco Schubert,  
16                                       Department of Biology, Chemistry and Pharmacy,  
17                                       Institute of Biology – Neurobiology,  
18                                       Freie Universität Berlin,  
19                                       Königin-Luise-Strasse 1-3, 14195 Berlin, Germany.  
20                                       Email: m.schubert@fu-berlin.de

21  
22  
23  
24  
25          **Running title:** bioaminergic modulation of crawling behavior

26  
27  
28  
29          **Keywords:** functional calcium imaging, *in vivo*, ventral nerve cord, VUM neurons, noxious and gentle  
30          tactile stimulation

31  
32  
33  
34

## 35 **Abstract**

36 Activation and modulation of sensory-guided behaviors by biogenic amines assure appropriate  
37 adaptations to changes in an insect's environment. Given its genetic tool kit *Drosophila melanogaster*  
38 represents an excellent model organism to study larger networks of neurons by optophysiological  
39 methods. Here, we studied stationary crawling movements of 3<sup>rd</sup> instar larvae and revealed how the  
40 octopaminergic VUM neuron system reacts during crawling behavior and tactile stimulations. We  
41 conducted calcium imaging experiments on dissections of the isolated nervous system (missing all  
42 sensory input) and found spontaneous rhythmic wave pattern of neuronal activity in VUM neuron  
43 clusters over the range of thoracic and abdominal neuromeres in the VNC. In contrast, *in vivo*  
44 preparations (semi-intact animals, receiving sensory input) did not reveal such spontaneous rhythmic  
45 pattern. However, tactile stimulations activated different clusters of the VUM neuron system  
46 simultaneously in these preparations. The activation intensity of VUM neurons in the VNC was  
47 correlated with the location and degree of body wall stimulation. While VUM neuron cluster near the  
48 respective location of body wall stimulation were less activated more distant cluster showed stronger  
49 activation. Repeated gentle touch stimulations led to decreased response intensities, repeated harsh  
50 stimulations resulted in increasing intensities over trials. Optophysiological signals correlated highly  
51 with crawling behavior in freely moving larvae stimulated similarly. We conclude that the  
52 octopaminergic system is strongly coupled to the neuronal pattern generator of crawling movements  
53 and that it is simultaneously activated by physical stimulation, rather intensity than sequential coded.  
54 We hope that our work raises the interest in whole biogenic network activity and shows that  
55 octopamine release does not only underlie "the more the better" principle but instead has a more  
56 complex function in control and modulation of insect's locomotion.

57

## 58 **Introduction**

59 Insects use information about their environment and internal physiological states to execute fast,  
60 reflex-like sensory-guided behavior. In contrast to goal-directed behavior which depends on  
61 multimodal integration and memory in higher brain centers of the supraoesophageal (cerebral)  
62 ganglion (hereafter referred to as 'brain') some autonomous rhythmic behaviors such as crawling,  
63 walking, swimming or flying are generated brain-independently in the nerve cord and the gnathal  
64 ganglia. Here, neuronal networks, including motoneurons that innervate the muscles as output  
65 elements, are responsible for the execution of coordinated behaviors such as locomotion. While in the  
66 intact animal, central pattern generators (CPG) are modulated by sensory input and the regulatory  
67 control of the brain, in isolated ventral cords they can work autonomously. The importance and  
68 function of neuronal CPGs for locomotor behavior in *Drosophila* larvae is discussed extensively (Fox *et*  
69 *al.*, 2006; Song *et al.*, 2007; Xiang *et al.*, 2010; Berni *et al.*, 2012; Gomez-Marin & Louis, 2012). The

70 modulation of CPGs by biogenic amines adds another important variable to the subject. In parallel to  
71 the motor network a small-sized network of octopaminergic neurons release octopamine (OA) onto  
72 neuromuscular junctions (NMJs) and potentially onto synapses within CPGs to modulate synaptic  
73 transmission and other physiological processes important for motor behaviors. In large insects such as  
74 locusts, the octopaminergic neurons of a thoracic ganglion, for example, are divided into different  
75 subpopulations with different morphologies (Watson, 1984; Duch *et al.*, 1999; Kononenko & Pflüger,  
76 2007) and functions (Burrows & Pflüger, 1995; Baudoux *et al.*, 1998; Duch & Pflüger, 1999). Techniques  
77 to alter the concentrations of biogenic amines were used to exploit effects on individual or small  
78 groups of neurons and the behavioral consequences. However, how whole neuronal aminergic  
79 networks in insects are functioning system-wide is less investigated and difficult to achieve with  
80 electrophysiological recording methods but, as demonstrated here, possible by optophysiological  
81 methods.

82 Octopamine is a member of the phenolamine family, synthesized from the amino acid L-  
83 tyrosine functioning as a neurotransmitter, a neuromodulator and a neurohormone in invertebrates.  
84 Based on structural and functional similarities, the monoamine OA and its direct precursor tyramine  
85 (TA) constitute the invertebrate counterpart of the vertebrate's norepinephrine and dopamine system  
86 (Roeder, 2005; Vömel & Wegener, 2008; Selcho *et al.*, 2012). Octopamine was first found and  
87 described in the salivary glands of octopoda (Erspamer, 1948) and was later comprehensively studied  
88 in arthropods and insects where it plays an important role in a variety of behavioral contexts (Roeder  
89 *et al.*, 2003; Roeder, 2005; Farooqui, 2012). It acts in the central as well as in the peripheral nervous  
90 system where it is released mainly under stress conditions, e.g. starvation (Wicher, 2007; Suo *et al.*,  
91 2009), aggression (Baier *et al.*, 2002; Stevenson *et al.*, 2005) or foraging (Fussnecker *et al.*, 2006;  
92 Scheiner *et al.*, 2006). Among its versatile functions, OA can alter the efficacy of neuromuscular  
93 transmission (Walther & Zittlau, 1998), changing energy metabolism (Mentel *et al.*, 2003), having  
94 hyperglycaemic action (Candy, 1978; Zeng *et al.*, 1996) and inhibiting myogenic oviduct rhythms,  
95 accessory hearts and gut movements (Orchard & Lange, 1986; Papaefthmiou & Theophilidis, 2001). In  
96 addition, it is discussed as the "reward transmitter" of insects in associative learning paradigms  
97 (Hammer, 1993; Hammer & Menzel, 1998; Schroll *et al.*, 2006; Waddell, 2013). Importantly, OA was  
98 found to be involved in the activity and modulation of central networks for locomotion (Hoyle & Dagan,  
99 1978; Sombati & Hoyle, 1984; Duch & Pflüger, 1999; Fox *et al.*, 2006; Pflüger & Duch, 2011). Its action  
100 had been studied extensively in large hemimetabolous insects such as locusts (for review see Bräunig  
101 and Pflüger (2001) but a number of studies were also concerned with the holometabolous *Drosophila*  
102 fly (Hoyer *et al.*, 2008; Vömel & Wegener, 2008; Zhou *et al.*, 2008; Busch *et al.*, 2009; Busch &  
103 Tanimoto, 2010; Selcho *et al.*, 2014; Pauls *et al.*, 2018), and the role of both amines, OA and TA in larval  
104 crawling (Selcho *et al.*, 2012) or OA in flight (Brembs *et al.*, 2007).

105 Common in insects, octopamine is released by a special class of neurons with bilaterally  
106 symmetrical axons in the ventral nerve cord and gnathal ganglia. These neurons have dorsal or ventral  
107 unpaired median cell bodies which, therefore, were called DUM or VUM neurons, respectively  
108 (Plotnikova, 1969; Crossman *et al.*, 1971; Hoyle, 1974; 1975; Hoyle & Dagan, 1978; Arikawa *et al.*, 1984;  
109 Bräunig & Pflüger, 2001). In locusts, these neurons fall into subpopulations which are differentially  
110 recruited during various motor tasks (Burrows & Pflüger, 1995; Baudoux & Burrows, 1998; Baudoux *et*  
111 *al.*, 1998; Duch *et al.*, 1999; Duch & Pflüger, 1999). In stick insects they are recruited during walking  
112 behavior (Mentel *et al.*, 2008) and descending VUM-neurons from the gnathal ganglion are involved  
113 in sensory gating (Stolz *et al.*, 2019). However, in the fruit fly, *Drosophila melanogaster*, it is unknown  
114 whether octopaminergic VUM neurons are also functionally subdivided during motor behavior.  
115 *Drosophila's* 3<sup>rd</sup> instar larval developmental state offers an octopaminergic system easily accessible for  
116 optophysiological investigations when compared to adult animals. Cell bodies of octopaminergic  
117 neurons can be found in the brain lobes and in the ventral nerve cord (VNC). As the larval body, the  
118 VNC is segmentally organized displaying three suboesophageal (s1-s3), three thoracic (t1-t3) and eight  
119 abdominal neuromeres (a1-a8), plus a small terminal neuromere at the end (a9). Clusters of  
120 octopaminergic cell bodies can be found in each neuromere. Thoracic and abdominal clusters can  
121 contain paired (VPM; t1-t3, a1) and unpaired (VUM; t1-t3, a1-a9) ventromedial neurons. Only the  
122 terminal neuromere possesses a dorsomedial cluster (DUM) (Vömel & Wegener, 2008; Selcho *et al.*,  
123 2012) (Fig. 1A). The primary neurites of thoracic and abdominal VUM neurons are projecting first  
124 dorsally and then bifurcate, projecting laterally and leaving the VNC via the peripheral nerve strands  
125 (Fig. 3A and Suppl. Fig. 2A). The axonal VUM neuron projections target all the animal's body wall  
126 muscles and modulate NMJ synapses by OA release (Monastirioti *et al.*, 1995; Monastirioti, 1999; Koon  
127 *et al.*, 2011; Koon & Budnik, 2012). Therefore, in this study we attempt to monitor the combinatory  
128 activity of the entire thoracic and abdominal population of VUM neurons in the VNC during larval  
129 crawling behavior simultaneously by optophysiological methods.

130 *Drosophila's* 3<sup>rd</sup> instar larvae offer a simple behavioral repertoire including peristalsis (forward  
131 and backward crawling), bending, turning and feeding (Green *et al.*, 1983; Fox *et al.*, 2006; Gomez-  
132 Marin & Louis, 2012). They use crawling behavior to execute escape reactions, to access food, to avoid  
133 competition and to find appropriate pupation areas. Forward crawling movements are initiated by the  
134 elevation and forward shift of the head and thorax body segments. Simultaneously a forward directed  
135 contraction wave starts traveling through the abdominal segments along the body axis from tail (body  
136 segment A8/9) to head (body segment A1) (Dixit *et al.*, 2008; Lahiri *et al.*, 2011; Berni *et al.*, 2012;  
137 Heckscher *et al.*, 2012). Backward movements are initiated by a retraction of the head and thorax  
138 followed by a backward directed contraction wave traveling through the abdominal body segments  
139 (Crisp *et al.*, 2008). All these behaviors are guided by sensory inputs, while the execution of movements

140 (crawling and turning) are autonomous behavioral patterns created within the segmental motor-  
141 network of the nerve cord (Berni *et al.*, 2012). The larval body segments are targeted by these networks  
142 via nerve strands connecting the central nervous system (CNS = brain lobes + VNC) with the body  
143 periphery. These peripheral nerve strands carry not only motoneurons and efferent VUM neurons but  
144 importantly also the afferences from sensory receptor neurons. However, it is uncertain how exactly  
145 sensory input modulates the generation of rhythmic crawling behavior and, likewise, it remains an  
146 unclarified question, if, how and where the octopaminergic system might be involved in such  
147 modulation processes - only in the periphery or potentially also in the CNS?

148 In the present study we used tactile stimulations of different degrees in strength to initiate  
149 peristaltic crawling movements and to activate the animal's octopaminergic system. By gentle and  
150 strong (noxious) physical touches against the external side of the animal's body wall we aimed to  
151 activate different types of mechanoreceptors and studied the modulatory involvement of the  
152 octopaminergic system on the escape crawling behavior of the fruit fly's 3rd instar larvae. We used  
153 calcium imaging techniques to examine the combinatory VUM neuron cluster activity in the VNC.

154

## 155 **Results**

156 In different experimental approaches we investigated if and how octopaminergic neurons are involved  
157 in pattern generators responsible for larval crawling behavior in *Drosophila melanogaster*. Therefore,  
158 we used calcium imaging techniques to record neuronal activity signals from isolated (deafferented)  
159 CNS dissections in **Experiment 1** (n = 17) of 3<sup>rd</sup> instar *Drosophila melanogaster* larvae expressing  
160 GCaMP3.0 in octopaminergic neurons (Tdc2-GAL4/UAS-GCaMP3.0). Furthermore, we used the same  
161 techniques and transgenic animals to record from semi intact *in vivo* preparations of the CNS in  
162 **Experiment 2 and 3** (n > 500). In these experiments ~60% of the isolated CNS dissections (n = 10) and  
163 in ~5% of the *in vivo* preparations (n = 27) we could measure changes in calcium concentrations  
164 signaling neuronal activity eligible for data analysis. In addition, we conducted behavioral open surface  
165 experiments observing the crawling performance of 3<sup>rd</sup> instar larvae (n = 148) before and after tactile  
166 stimulations in **Experiment 4**.

167

168 **Experiment 1. Spontaneous activity pattern in the VUM neuron system of isolated (deafferented)**  
169 **CNS preparations.** We started our investigation by scrutinizing the role of octopaminergic neurons in  
170 active central pattern generators (CPG) of the isolated CNS. The isolation of the brain and ventral nerve  
171 cord prohibits any influence of afferent sensory input from the periphery on CPGs and permits only  
172 neuronal mechanisms and connections within the CNS. Besides arrhythmic neuronal activity,  
173 deafferented CNS dissections showed rhythmic wave pattern (posterior to anterior and *vice versa*)  
174 restricted to the thoracic and abdominal VUM neuron system in the VNC (Fig. 1B and Suppl. Movies 1



175 and 2). Rhythmic wave patterns are an indication for a possible participation of the octopaminergic  
 176 system in larval crawling behavior since similar spatio-temporal patterns were already found

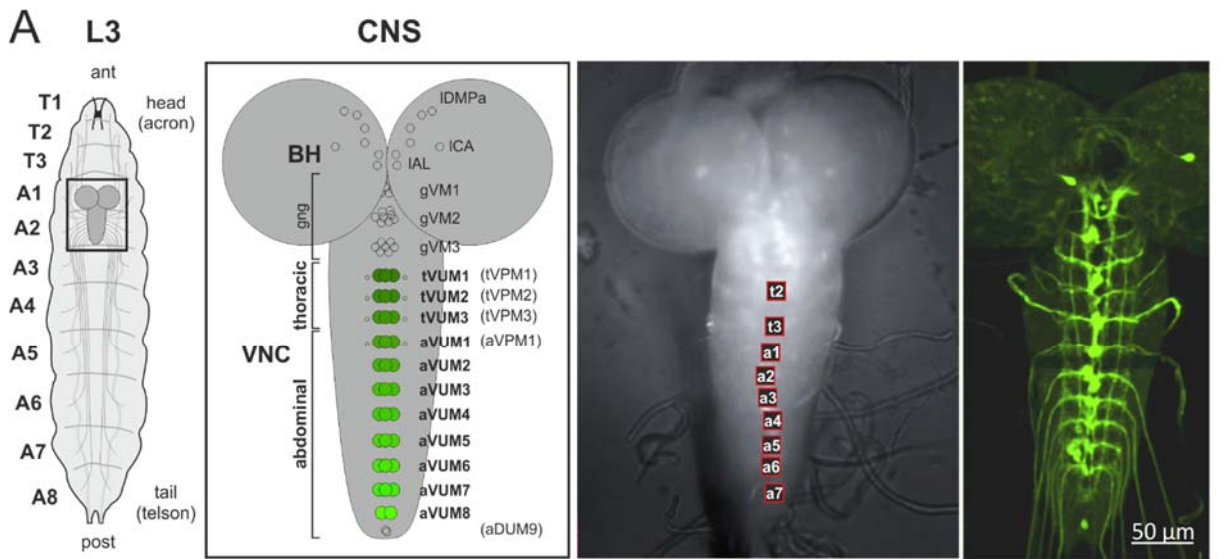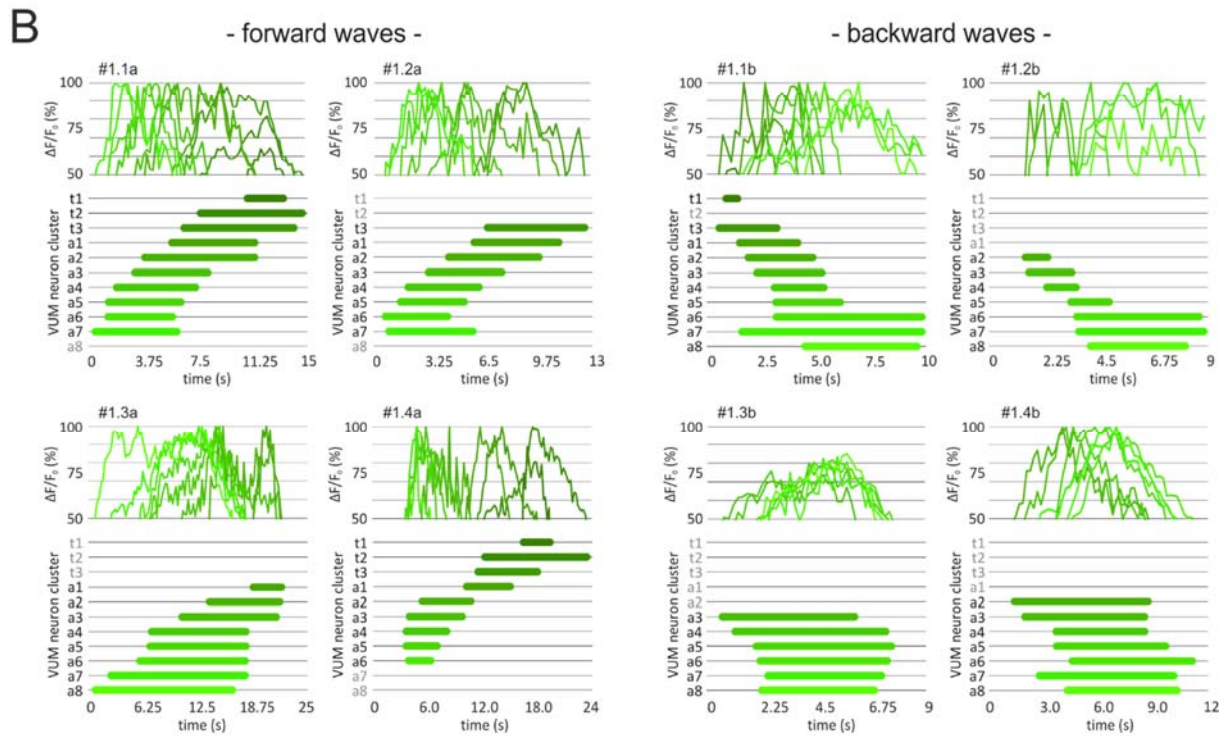

|                                                                   | <i>forward</i><br>waves | <i>backward</i><br>waves | average <i>forward</i><br>wave duration | average <i>backward</i><br>wave duration |
|-------------------------------------------------------------------|-------------------------|--------------------------|-----------------------------------------|------------------------------------------|
| VUM neuron pattern isolate CNS<br>Tdc2-GCaMP3 (n = 10; T1-A8)     | 28                      | 11                       | <b>10.8 ± 4.8 s</b>                     | <b>8.3 ± 1.2 s</b>                       |
| Motorneuron pattern isolate CNS<br>OK371-GCaMP (n = 10; T3-A8/9)* | 10                      | 10                       | <b>10.9 ± 6.0 s</b>                     | <b>5.3 ± 3.1 s</b>                       |

177 (\*Pulver et al. - J Neurophysiol - 2015)

178 **Figure 1.** Spontaneously occurring activity wave pattern in octopaminergic VUM neuron cluster. Panel A shows the  
 179 segmented body (T1-A8) of a 3<sup>rd</sup> instar larvae and its CNS with neuronal projections innervating the body wall of each

180 hemisegment (*left*). The CNS consists of two brain hemispheres and one elongated VNC. Three octopaminergic cell body  
181 cluster can be found in both brain hemispheres (IDMPa: larval anterior dorsomedial protocerebrum cluster; ICA: larval calyx  
182 cluster; IAL: larval antennal lobe cluster; after (Selcho *et al.*, 2014)) and 15 cluster in the VNC, three of which can be found in  
183 the gnathal (gVM1-3), three in the thoracic (tVUM1-3; tVPM1-3) and 9 in the abdominal neuromeres (aVUM1-8; aVPM1;  
184 aDUM9). Our investigation concentrated on the thoracic (tVUM1-3) and abdominal cluster (aVUM1-8) colored in different  
185 shades of green (*center left*). The anatomical grey scale image shows the ventral side of the brain. ROIs were set where cluster  
186 could be identified based on GCaMP5 auto-fluorescence (red squares, 5 x 5 pixel). In the shown example cluster tVUM2-  
187 aVUM7 (t2-a7) appeared in the focal plane and could be analyzed for fluorescence changes during imaging measurements  
188 (*center right*). The confocal microscopy image shows cluster and bilateral axonal projections of VUM neurons leaving each  
189 thoracic and abdominal VNC neuromere via paired nerve strands towards their appointed body segments (*right*). In panel **B**  
190 spontaneously occurring forward (*left*) and backward (*right*) wave pattern in the isolated brain preparations are visualized.  
191 Line graphs signify fluorescence changes over time passing the half maximum (50%) intensity threshold for each cluster.  
192 Beneath, horizontal bar graphs signify only the time fluorescence was passing the 50% threshold in each individual cluster to  
193 clearly visualize wave pattern. The table in panel **C** compares wave durations of forward and backward VUM neuron pattern  
194 with fictive locomotor pattern found in motoneurons of isolated brain preparations in *Drosophila* larvae by (Pulver *et al.*,  
195 2015).

196  
197 in VNC motoneurons for a fictive crawling pattern (Pulver *et al.*, 2015). From 10 larval CNS dissections  
198 we analyzed 28 forward and 11 backward waves. Sixty percent of the animals showed both forward  
199 and backward waves whereas 40% showed only forward waves. Their occurrence was irregular and, in  
200 some cases, overlapping meaning that a new wave was initiated already before the preceding one was  
201 terminated. The average wave time lasted  $9.8 \text{ sec} \pm 4.4 \text{ s.d.}$  with forward waves being slightly slower  
202 ( $10.8 \text{ sec} \pm 4.8 \text{ s.d.}$ ) than backward waves ( $8.3 \text{ sec} \pm 1.2 \text{ s.d.}$ ) (unpaired t-test,  $p = 0.039$ ) (Fig. 1C). The  
203 average VUM neuron activity duration for individual clusters was found  $4.2 \text{ sec} \pm 2.5 \text{ s.d.}$  In one  
204 exceptional case we were able to see activation pattern beyond thoracic and abdominal clusters in the  
205 gnathal ganglia cluster and the brain cluster. However, these activations could not be assigned to be  
206 part of any wave pattern. After recordings of spontaneous activity, we pharmacologically induced VUM  
207 neuron activity by applying pilocarpine (a muscarinic acetylcholine receptor agonist) to the CNS  
208 dissections. Although pilocarpine induces activity pattern in the CNS of many insects (Ryckebusch &  
209 Laurent, 1993; Büschges *et al.*, 1995; Johnston & Levine, 1996; Johnston *et al.*, 1999) its application  
210 neither changed the average wave time durations ( $10.3 \text{ sec} \pm 4.6 \text{ s.d.}$ ) nor increased the average cluster  
211 activity duration ( $4.7 \text{ sec} \pm 2.6 \text{ s.d.}$ ) (unpaired t-test,  $p > 0.05$  in both cases). The maximum change in  
212 fluorescence intensity during wave pattern reached a value of  $23.52 \pm 9.3$  (change in absolute grey  
213 scale values, calculated against the background).

214

215 **Experiment 2. Activity pattern in the VUM neuron system of *in vivo* preparations.** In contrast to  
216 *Experiment 1* we were not able to see spontaneous neuronal activity pattern in the VUM neuron  
217 system of *in vivo* preparations. *In vivo* preparations of larvae had the brain and all nerve cords with

218 afferent and efferent neurons completely intact. These larvae were able to execute stationary crawling  
219 movements in forward and backward direction while being held in place by pins at the anterior head

A

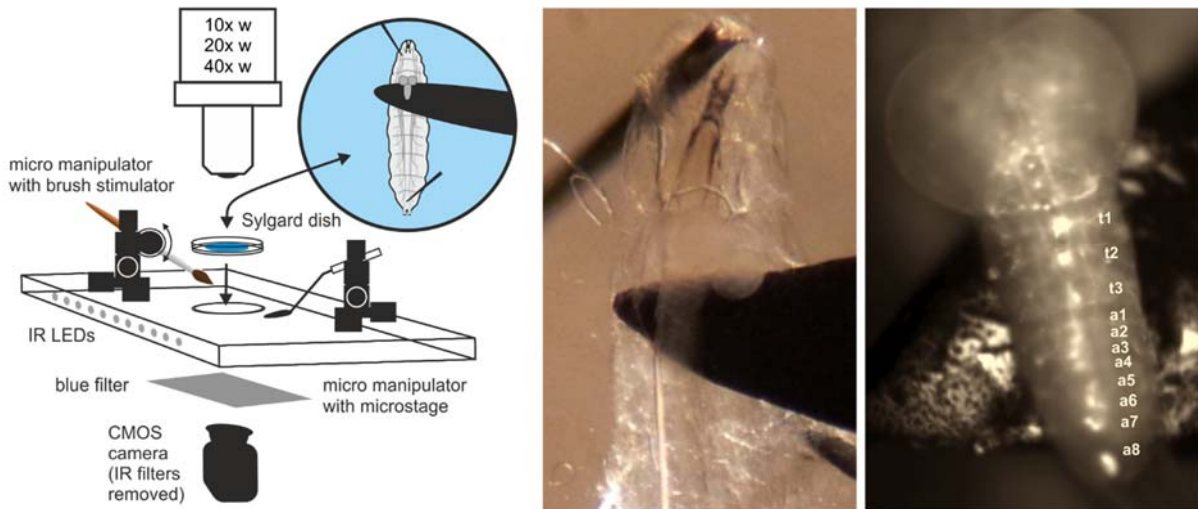

B

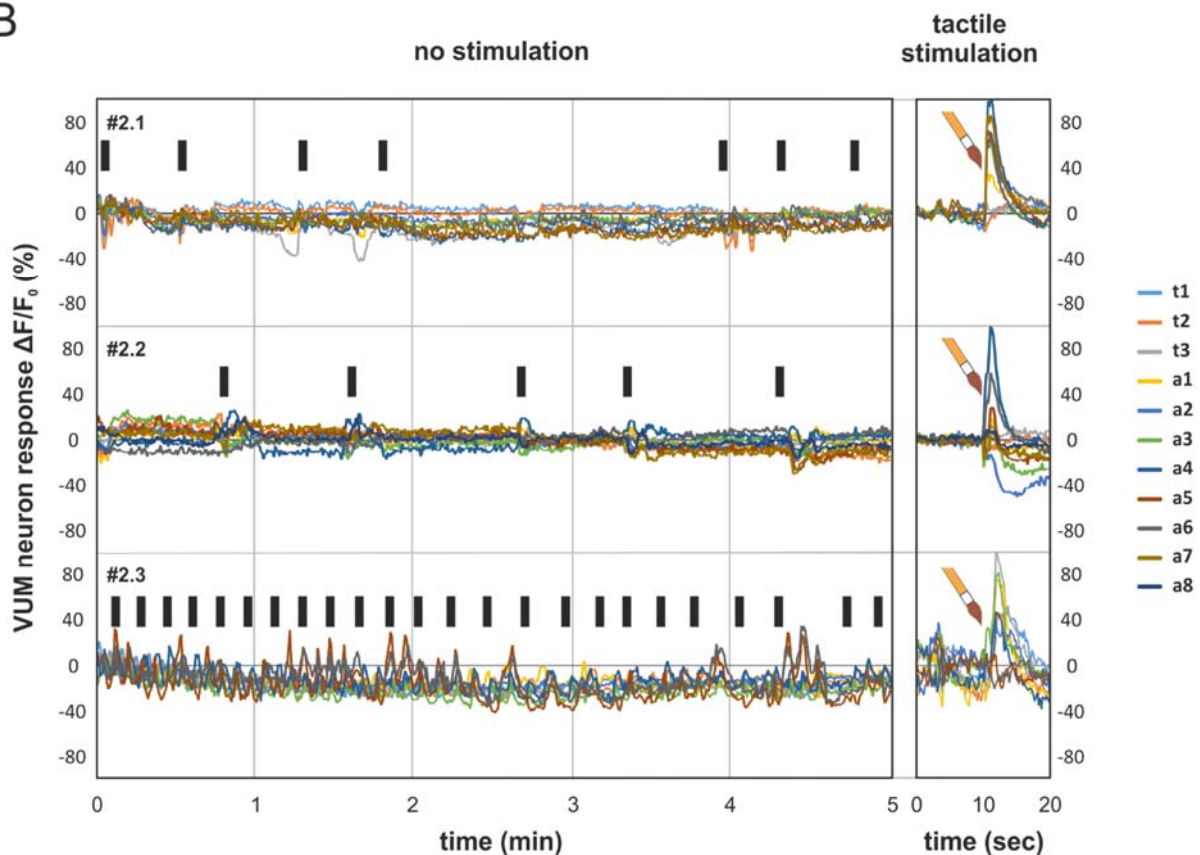

220

221 **Figure 2.** Activity pattern in the VUM neuron system of in vivo preparations. The sketch in panel A shows important parts of  
222 the experimental setup (*left*). Third instar larvae were pinned onto a Sylgard dish and were covered by saline. The dish was  
223 placed under the microscope on a acrylic glass platform equipped with two micromanipulators for stimulators and the  
224 microstage. The transparent platform had infrared (IR) LEDs and a CMOS camera allowing for video capturing of larval  
225 movements in the dark. The microstage was carefully positioned under the VNC (*center*) and the fluorescence of identified  
226 VUM neuron clusters were imaged (*right*). Panel B shows calcium imaging recordings over 5 minutes of VUM neuron clusters  
227 in the VNC of unstimulated larvae (*left*). Black bars signify larval crawling behavior confirmed by control ROIs outside the VNC



228 in calcium imaging analysis and video capturing. Unstimulated larvae showed no consistent VUM neuron responses correlated  
229 to crawling movements. Sixty seconds after each 5 minute recording a new recording started comprising a tactile brush  
230 stimulation after 10 seconds (*right*). Tactile brush stimulations resulted in strong VUM neuron responses in many abdominal  
231 and thoracic cluster.

232  
233 segment and the telson ([Fig. 2A](#) and [Suppl. Movie 3](#)). These stationary movements occurred  
234 spontaneously without any experimental stimulations. Measured over 5 minutes, crawling or other  
235 behavioral movements were not accompanied by related neuronal activity wave pattern in the VUM  
236 neuron system as found in deafferented CNSs of *Experiment 1* ([Fig. 2B, left panel](#)). Thus, sensory  
237 feedback from stationary crawling movements is not sufficient to trigger VUM neuron activity or wave  
238 pattern in *Drosophila* larvae.

239 Conversely, when the body wall of a larva was stimulated by harsh tactile brush stimulation at the  
240 posterior end of the larvae the thoracic and abdominal VUM neuron system responded strongly.  
241 However, stimulations did not initiate wave pattern activity but led to strong simultaneous activity (in  
242 the boundaries of our time resolution given by the calcium sensor GCaMP3,  $t^{1/2} = 83 \pm 2$  ms) ([Fig.2,](#)  
243 *right panel*). These results were found consistently between animals. The maximum change in  
244 fluorescence intensity after harsh brush stimulation reached on average a value of  $143.91 \pm 28.27$   
245 (change in absolute grey scale values, calculated against the background).

246 In very rare cases pilocarpine application to intact brains (incubation of 5-10 min) led to flicker (on-  
247 off) activity in individual VUM neuron cell bodies lacking any coordination within the same or between  
248 different VUM neuron cluster ([Suppl. Movies 4 and 5](#)). Thus, individual VUM neurons have the  
249 potential to show independent activity from VUM neurons of the same or other cluster. However, the  
250 phenomenon of individual VUM neuron activity appeared only after pharmaceutical application or  
251 after damaging neuronal tissue during dissections.

252  
253 ***Experiment 3. VUM neuron pattern in response to consecutive tactile stimulations.*** To reveal how  
254 stable and consistent simultaneous VUM neuron responses occur after tactile stimulation we applied  
255 multiple stimulations within each experimental run. In addition to harsh brush stimulations ([Fig. 3, in](#)  
256 *shades of red* and [Suppl. Movie 6](#)) we also applied gentle rod stimulations ([Fig. 3, in shades of blue](#) and  
257 [Suppl. Movie 7](#)) to see if and how the VUM neuron system responds to different degrees of tactile  
258 stimulation and body wall deflections. Larvae were stimulated three times in each experimental run  
259 after 10, 30 and 50 seconds (20 seconds inter trial interval, ITI) either at posterior or anterior body  
260 segments.

261 Posterior brush stimulations elicited strong and slightly increasing fluorescence responses over  
262 successive stimulations without total recovery of baseline fluorescence within 20 seconds ITIs ([Fig. 3B,](#)  
263 *left panel* and [Suppl. Movie 8](#)). For data analysis responses were averaged over 10 seconds after each

264 stimulation and for each VUM neuron cluster. Although simultaneously active individual cluster  
 265 differed in response strength, cluster aVUM8 (a8) - the cluster which gets sensory input from body

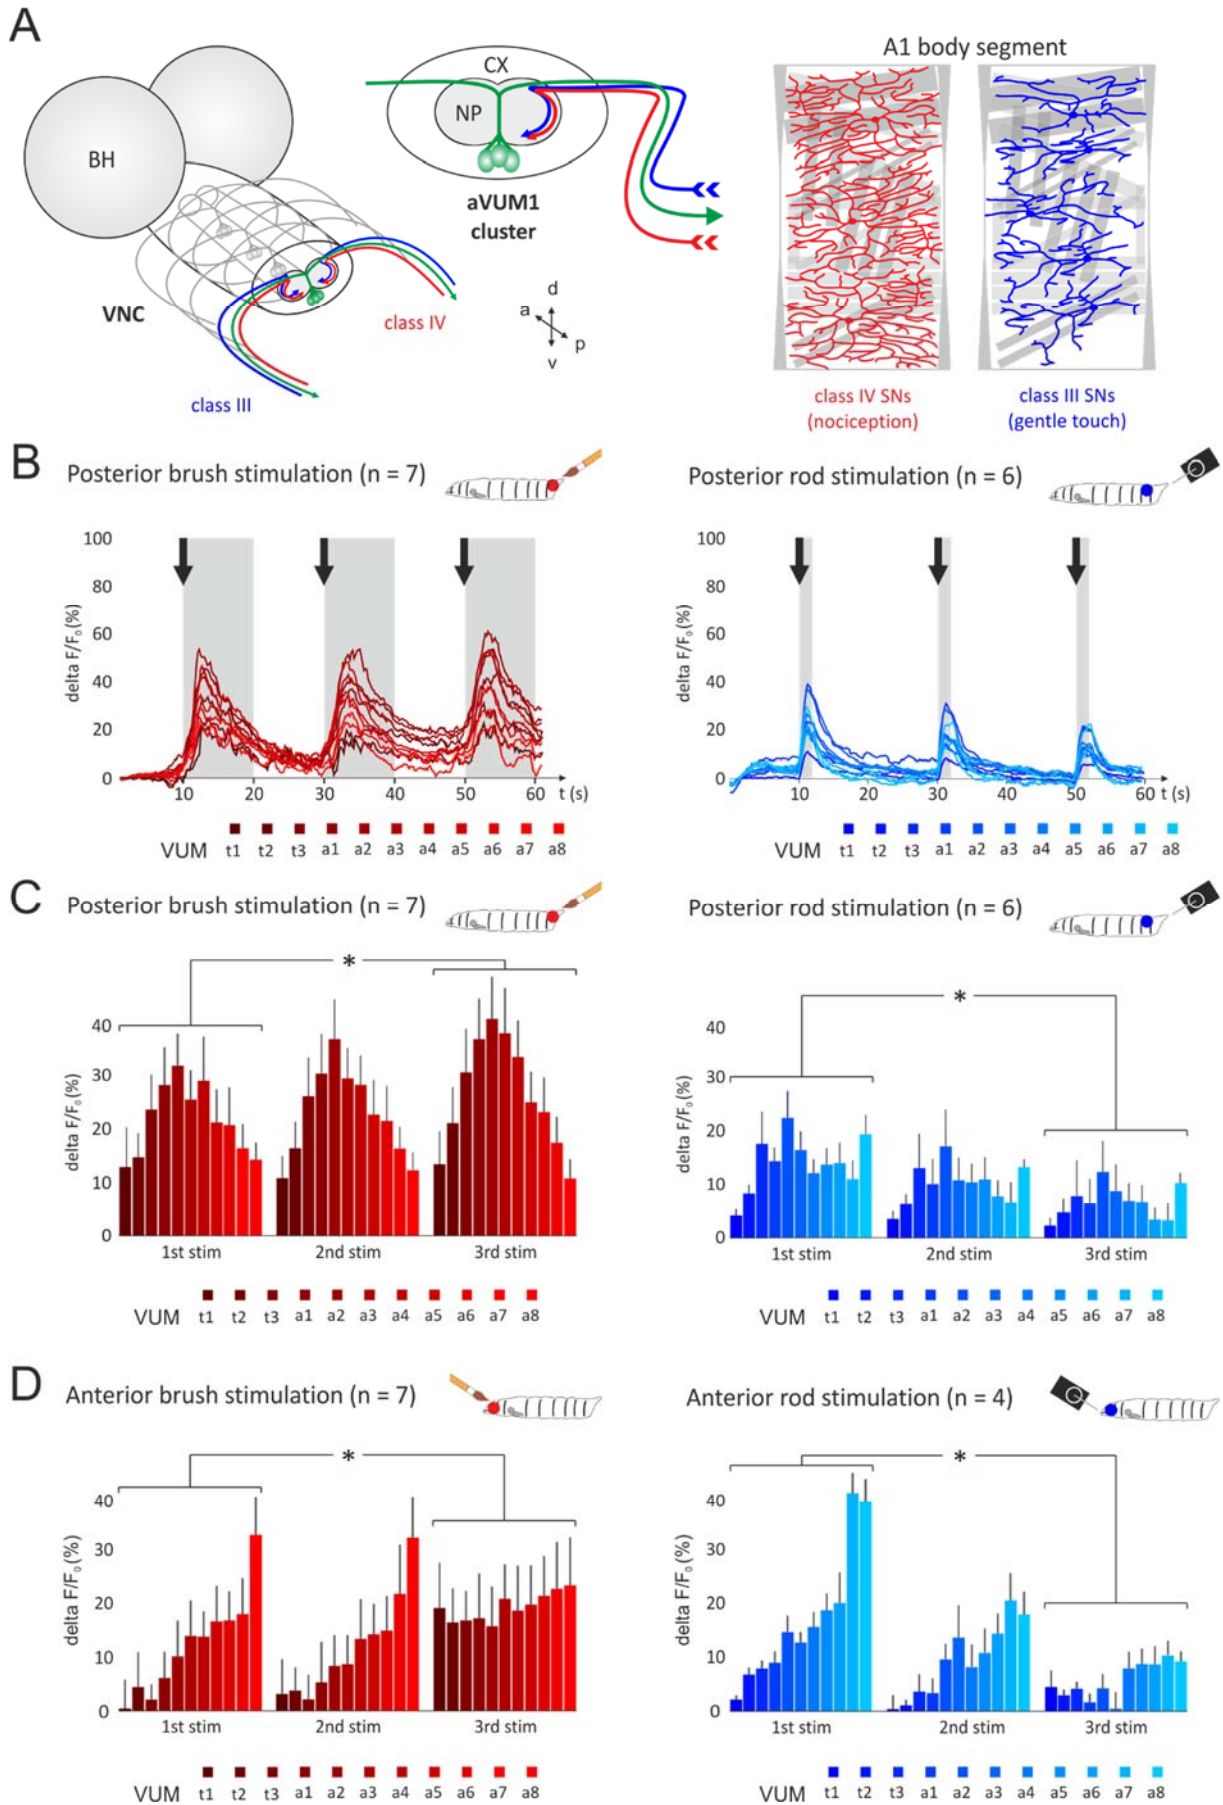

267 **Figure 3.** VUM neuron pattern in response to consecutive tactile stimulations. **A** Schematic drawing of the paired brain  
268 hemispheres and the VNC cut in the axial plane at abdominal VUM neuron cluster a1 (aVUM1). Three thoracic cluster (tVUM1-  
269 3) are shown in grey whereas abdominal cluster a1 is shown in green (*left*). VUM neuron cell bodies are located ventral medial  
270 and their primary neurite bifurcates dorsally descending axonal projections to corresponding body segments and NMJs.  
271 Ascending class III and class IV sensory neurons are depicted in blue and red, respectively. Class III and class IV neurons enter  
272 the neuropile at the dorsal part and project to their ventral target regions (*center*). Covering each body hemisegment harsh  
273 and gentle touch stimulations are perceived by class IV and class III sensory neurons, respectively (*right*). **B** Harsh (*left, in*  
274 *shades of red*) and gentle (*right, in shades of blue*) tactile stimulation of the larval body wall elicit different response activities  
275 in VUM neurons. The graphs are showing activation of identified thoracic and abdominal VUM neuron cluster over 60  
276 seconds. Larvae were stimulated at the posterior end of the body either harshly with a brush (*left*) or gently with a small  
277 metal rod (*right*) three times in each experimental run after 10, 30 and 50 seconds (black arrows). Brush stimulations elicited  
278 strong and slightly increasing fluorescence responses over successive stimulations without total recovery of baseline  
279 fluorescence within 20 seconds after stimulations. Rod stimulations in contrast elicited strong but decreasing responses over  
280 successive stimulations. **C** Quantification of individual cluster responses to posterior brush stimulation (*left*) and posterior  
281 rod stimulation (*right*). After each stimulation responses to brush or rod stimulations were averaged over 50 (10 seconds) or  
282 10 (2 seconds) consecutively imaged frames, respectively (as indicated by the grey boxes in B). A statistically significant  
283 difference between responses (over all 11 cluster) was found after the first and the third stimulation. **D** Quantification of  
284 individual cluster responses to anterior brush stimulation (*left*) and anterior rod stimulation (*right*) A statistically significant  
285 difference between responses (over all 11 cluster) was found after the first and the third stimulation. Error bars represent  
286 standard errors.

287  
288 segment A8 where the animal was stimulated the most - showed the lowest response intensity of all  
289 abdominal clusters. Cluster aVUM2 (a2) showed highest response intensity and all other abdominal  
290 clusters in between showed increasing intensities. However, after the peak response in cluster a2  
291 response intensities decreased again in cluster a1, t3, t2 and t1. This pattern was consistently found in  
292 all consecutive stimulations. The average response intensity over all clusters were statistically  
293 compared between first, second and third stimulation (1<sup>st</sup> stim, 2<sup>nd</sup> stim and 3<sup>rd</sup> stim, respectively).  
294 Paired t-tests found a significant increase between responses after the 1<sup>st</sup> and 3<sup>rd</sup> stimulation ( $p =$   
295  $0.017$ ;  $n = 7$ ) ([Fig. 3C, left panel](#)).

296 Anterior brush stimulations elicited also strong and slightly increasing fluorescence responses over  
297 successive stimulations, however the simultaneous VUM neuron response pattern differed from  
298 posterior stimulations. Anterior brush stimulations led to weak responses in thoracic cluster and  
299 produced increasing response strength from abdominal cluster aVUM1 (a1) to a maximum in  
300 abdominal cluster aVUM8 (a8). Statistical comparison between responses after 1<sup>st</sup>, 2<sup>nd</sup> and 3<sup>rd</sup>  
301 stimulation using paired t-tests showed a significant increase between responses after the 1<sup>st</sup> and 3<sup>rd</sup>  
302 stimulation ( $p = 0.010$ ;  $n = 7$ ) ([Fig. 3D, left panel](#)). The maximum change in fluorescence intensity after  
303 tactile brush stimulation (including posterior and anterior stimulations) reached an average value of  
304  $104.48 \pm 50.79$  (change in absolute grey scale values, calculated against the background).

305 Posterior rod stimulations in contrast, elicited strong but decreasing responses over successive  
306 stimulations (Fig. 3B, right panel and Suppl. Movie 9). Responses were averaged over 2 seconds after  
307 each stimulation and for each VUM neuron cluster. Again, VUM neurons responded simultaneously  
308 and the response strength differed between individual cluster. Cluster aVUM8 (a7) - the cluster which  
309 gets sensory input from body segment A7 where these animals were stimulated - showed the lowest  
310 response intensity of abdominal cluster. Cluster aVUM2 (a2) showed highest response intensity and  
311 intensities decreased again in cluster a1, t3, t2 and t1. Paired t-tests found a significant decrease  
312 between responses after the 1<sup>st</sup> and 3<sup>rd</sup> stimulation ( $p < 0.001$ ;  $n = 6$ ) (Fig. 3C, right panel).

313 As for brush stimulations anterior rod stimulations produced weakest responses in anterior cluster  
314 and strongest responses in posterior cluster but showed decreasing responses over successive  
315 stimulations. Paired t-tests found a significant decrease between responses after the 1<sup>st</sup> and 3<sup>rd</sup>  
316 stimulation ( $p = 0.011$ ;  $n = 4$ ) (Fig. 3D, right panel). The maximum change in fluorescence intensity after  
317 tactile rod stimulation (including posterior and anterior stimulations) reached an average value of  
318  $52.23 \pm 40.61$  (change in absolute grey scale values, calculated against the background).

319 Altogether, VUM neurons showed consistently weaker responses in those clusters which are getting  
320 sensory input from stimulated body segments and stronger responses in clusters getting input from  
321 segments further away from stimulated segments.

322

323 **Experiment 4. Tactile stimulation of freely moving larvae - a correlation between optophysiological**  
324 **recordings and behavioral observation data.** In a last step we wanted to investigate if tactile  
325 stimulations and hence a change in VUM neuron activity (as shown in **Exp. 2** and **Exp. 3**) have any effect  
326 on the larval crawling behavior. Since VUM neuron activity results in a release of octopamine at the  
327 target areas of axonal projections, the NMJs and muscle fibers (Fig. 4A), synaptic properties and muscle  
328 conditions are expected to be altered leading to changes in crawling dynamics (compare Koon et al.  
329 2011).

330 In very simplistic behavioral assays we concentrated on changes in the crawling frequencies of larvae  
331 after repeated tactile stimulations of different degrees (gentle rod and harsh brush stimulations). Both  
332 types of stimulations were conducted in respective experimental groups. Before stimulations larvae in  
333 the gentle rod stimulation group displayed undisturbed foraging behavior with a crawling frequency  
334 of 0.90 Hz during 20 seconds ( $n = 65$ ). After three successive stimulations with an inter trial interval  
335 (ITI) of 20 seconds frequencies first increased to 1.05 Hz and then decreased again to 0.98 Hz and 0.96  
336 Hz after the 1<sup>st</sup>, 2<sup>nd</sup> and 3<sup>rd</sup> stimulation, respectively (Suppl. Fig. 3A). Larvae in the harsh brush  
337 stimulation group initially showed a crawling frequency of 0.71 Hz before stimulations ( $n = 83$ ). After  
338 successive stimulations frequencies increased to 0.81 Hz, 0.88 Hz and 0.90 Hz after the 1<sup>st</sup>, 2<sup>nd</sup> and 3<sup>rd</sup>  
339 stimulation, respectively (Suppl. Fig. 3B).



340 To compensate for the difference in initial crawling frequencies (before 1<sup>st</sup> stimulation) between  
 341 experimental groups a crawling index was calculated before statistical comparisons were made. For  
 342 index calculations in both experimental groups, the number of crawling events after each stimulation

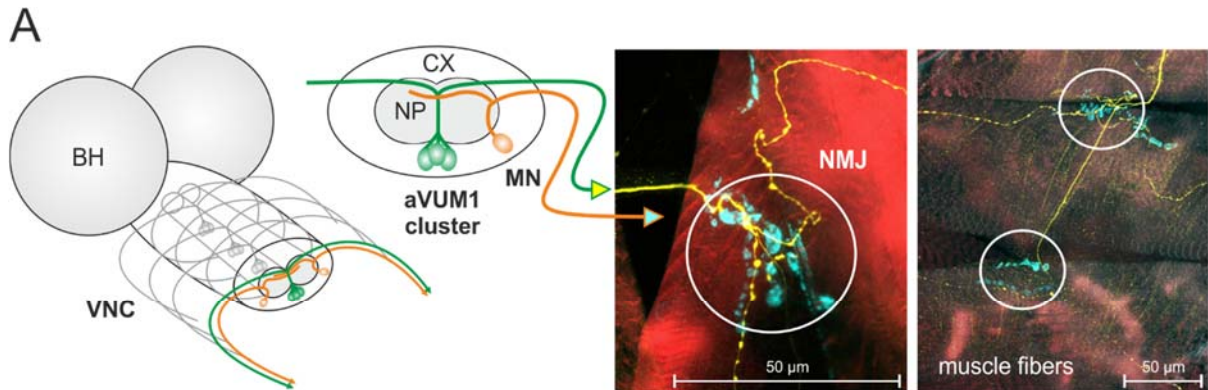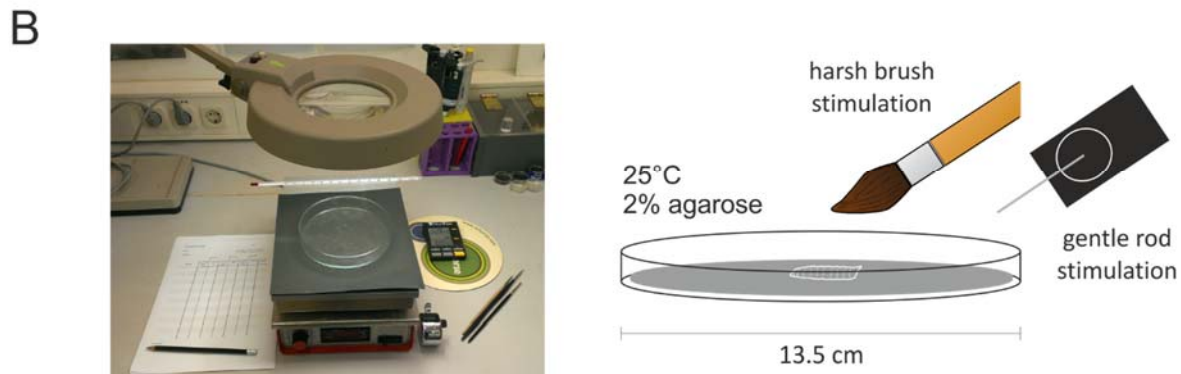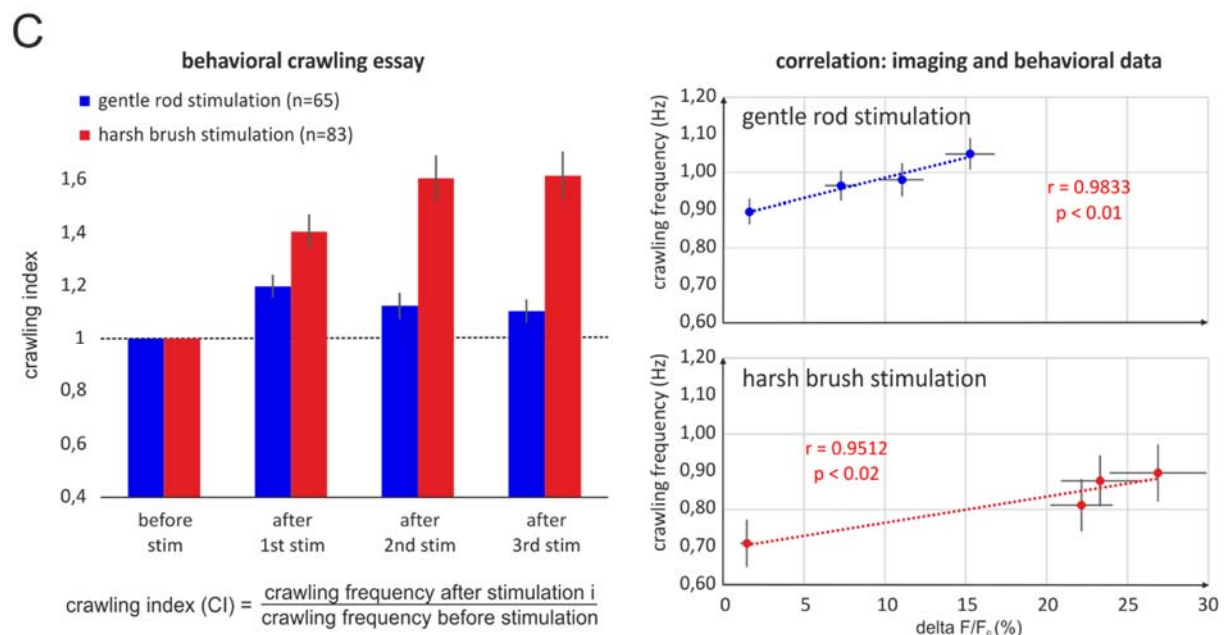

343 **Figure 4.** Tactile stimulation of freely behaving larvae. **A** Schematic drawing of the paired brain hemispheres and the VNC cut  
 344 in the axial plane at abdominal VUM neuron cluster a1 (aVUM1) (left). Descending axonal projections of aVUM1 neurons  
 345 (green) and motoneurons (orange) leave the VNC in parallel via the same nerve strands bilaterally and project to muscle  
 346 fibers of their corresponding body segment A1. VUM neurons target NMJs at multiple muscle fibers and have lateral Type II  
 347 projections along the muscle fibers (*right, confocal images*). In confocal images VUM neurons are depicted in yellow, NMJs  
 348 in cyan and muscle fibers (actin filaments) in red. **B** In behavioral essays larvae were released in the center of a glass dish  
 349



350 cast with 2% agarose. The dish was placed on a temperature controlled plate and behavioral performances were observed  
351 under a magnification glass (2x). Crawling events were counted before and after harsh brush and gentle rod stimulations in  
352 respective experimental groups. **C** Bar graphs show the crawling performance index of larvae during a time period of 20  
353 seconds before any stimulation and 20 seconds after each of the three successive stimulations (ITI of 20 seconds). In blue and  
354 red responses to gentle rod ( $n = 65$ ) and harsh brush ( $n = 83$ ) stimulations are given, respectively. Responses to gentle rod  
355 stimulations increased the crawling frequency after the first stimulation but then decreased again after the second and third  
356 stimulation. In contrast, responses after harsh brush stimulations show ever increasing crawling frequencies after each  
357 stimulation (*left*). Correlation analysis between imaging and behavioral data were performed using linear regression analysis  
358 and Pearson's correlation coefficients. Both data sets are highly correlated (*right*). Error bars represent standard errors.

359  
360 were divided by the number of crawling events before the 1<sup>st</sup> stimulation. Therefore, controls before  
361 stimulation have a crawling index of 1. After the 1<sup>st</sup> stimulation the index of both experimental groups  
362 increased, however stronger in the harsh brush stimulation group (gentle rod: 1.20; harsh brush: 1.40).  
363 After the 2<sup>nd</sup> stimulation the index for the gentle rod stimulation group dropped to 1.12 whereas the  
364 index for the harsh brush stimulation group further increased to 1.60. After the 3<sup>rd</sup> and last stimulation  
365 the index for the gentle rod stimulation group further decreased to 1.10 and it further increased in the  
366 harsh brush stimulation group to 1.61 (**Fig. 4C, left panel**, gentle rod group in blue and harsh brush  
367 group in red).

368 For correlation analysis between behavioral crawling frequencies and optophysiological signal  
369 intensities (averaged over all measured VUM neuron cluster) in both experimental groups we used  
370 linear regression analysis and Pearson's correlation coefficients. Analysis revealed a significant  
371 correlation between both data sets in both experimental groups (gentle rod:  $r = 0.98$ ,  $p < 0.01$ ; harsh  
372 brush:  $r = 0.95$ ,  $p < 0.02$ ) (**Fig. 4C, right panel**). Therefore, successive tactile stimulations of different  
373 degrees lead to characteristic adaptation of both the neuronal VUM neuron activity and the crawling  
374 behavior. In case of gentle rod stimulations this means habituation after an initial increase and  
375 sensitization in case of harsh brush stimulations.

376

## 377 **Discussion**

378 Motivated by the many electrophysiological studies concentrating on individual or small populations  
379 of VUM neurons simultaneously, we wanted to reveal how the VUM neuron system reacts during  
380 crawling behavior as an entity. Therefore, we conducted calcium imaging experiments on the nervous  
381 system of *Drosophila* larvae. In isolated larval CNS dissections that do not receive sensory input we  
382 found spontaneous rhythmic wave pattern of neuronal activity in VUM neuron clusters over the range  
383 of thoracic and abdominal neuromeres in the VNC. Surprisingly, *in vivo* preparations that receive  
384 sensory input did not show such spontaneous rhythmic pattern, no matter if the animals were  
385 executing crawling movements or not. However, tactile stimulations activated different clusters of the  
386 VUM neuron system simultaneously while the activation intensity was correlated with the location and

387 degree of body wall stimulation. While the response of VUM neurons in stimulated neuromeres was  
388 low, it increased in distant neuromeres. Moreover, the response intensities to repeated gentle touch  
389 stimulations decreased, while they increased with repeated harsh stimulations over trials. The  
390 optophysiological signals correlated highly with crawling behavior in freely moving larvae stimulated  
391 similarly with gentle and harsh touches.

392 VUM neuron patterns found in our isolated CNS preparations were very similar to fictive crawling  
393 patterns in motoneurons of deafferented larval CNS of *Drosophila melanogaster* (Pulver *et al.*, 2015).  
394 This suggests a possible coupling of VUM neurons to the central pattern generator for larval crawling  
395 behavior. However, in many cases the isolated CNS produces rhythms only similar and not identical to  
396 the ones of intact animals but if phase relations of antagonistic systems are retained, the respective  
397 motor behavior of the isolated CNS is called “fictive”. Thus, removing sensory organs could lead to  
398 changes in the functional principles of the whole pattern generator (CPG + sensory organs) (Bässler,  
399 1986). How sensory information from the periphery is processed in the VNC and the brain to allow  
400 smooth locomotor behavior is still a matter of extensive research. Here we propose VUM neurons as  
401 one possible system to modulate either indirectly the endogenous input or directly the central pattern  
402 generating neurons as a response to external tactile stimulation of the body wall. Two scenarios can  
403 be considered: first, tactile stimulation *triggers* the pattern generator provoking a reflex and second,  
404 tactile stimulation *modulates* the frequency of the already oscillating pattern generator. Both  
405 scenarios can be explained by an endogenous input gradually changed and pushed above threshold by  
406 sensory and/or modulatory neurons (e.g. octopaminergic VUM neurons) without input from higher  
407 brain centers. In this model, octopaminergic neurons would be involved in gating processes similar to  
408 what has been found in stick insects (Stolz *et al.*, 2019) or, perhaps, in changes associated with an  
409 animal being active and starting a dynamic period of behavior.

410

#### 411 **Sequential modulation in VUM neuron cluster activity**

412 The repeated sequential activation patterns in isolated CNS could have been triggered by either a  
413 sequential recruitment by neurons presynaptic to VUM neurons and/or by a delayed coupling between  
414 clusters. Work on *Manduca sexta* larvae showed that fictive crawling motor patterns were  
415 accompanied by rhythmic activation of unpaired median (UM) neurons in all segmental ganglia derived  
416 partially from a source within the gnathal ganglion (Johnston & Levine, 1996; Johnston *et al.*, 1999).  
417 Because of very short anterior-to-posterior activation delays (~10 ms) only one or few descending  
418 neurons of the gnathal ganglion projecting posteriorly to all segmental ganglia could be responsible  
419 for all efferent UM neuron inputs. However, the sequential activation in isolated CNS preparations of  
420 *Manduca sexta* larvae appear much faster than those found in *Drosophila melanogaster* larvae  
421 preparations. The reason for this could be differences in the network organization and/or neuronal

422 properties but is so far unknown. In strong contrast to our isolated CNS preparations, VUM neuron  
423 activation in our *in vivo* experiments (whole animal with intact sensory system) was synchronous and  
424 appeared only after tactile stimulation, not during crawling. A possible reason for that could be the  
425 fixed position of the larvae allowing only stationary crawling movements. Importantly, under fixed  
426 conditions VUM neuron activation appears rather intensity than sequentially modulated. (Hu *et al.*,  
427 2017) identified a pair of interneurons (a08n) with their cell bodies located in abdominal neuromere  
428 a8 and having ascending ramifications over all thoracic and abdominal neuromeres. These  
429 ramifications were situated in very close vicinity to nociceptive receptor neuron axon terminals in the  
430 VNC which can detect harsh mechanical stimulations of the larval body wall (class IV dendritic  
431 arborization neurons, class IV da). Importantly, a08n neurons responded to an optogenetically  
432 activation of these nociceptive receptor neurons. Thus, in principle, a08n neurons could spread  
433 information of tactile stimulation over the VNC with minimal delay and activate almost simultaneously  
434 a downstream octopaminergic network system wide. Although still unclear, mechanisms of an  
435 intensity modulation by the VUM neuron system could lead, in theory, to an aminergic readout about  
436 where and how strongly in the periphery the sensory system was activated, thus encoding a  
437 somatotopic map of the larval body wall. If VUM neurons and motoneurons are integral parts of the  
438 same pattern generator for fictive crawling behavior, it is noteworthy that simultaneous activity in  
439 VUM neurons would lead to octopaminergic modulation at their target NMJs preceding motoneuronal  
440 input at most of the body wall segments and muscles. This is however not contradictory because of the  
441 long-lasting effect of octopamine, resulting e.g. in synapses being prepared beforehand the arrival of  
442 neuronal input. The idea of a synchronous activation by a common interneuron is also promoted by  
443 recordings after pilocarpine application in which we saw cluster and individual VUM neurons activated  
444 individually. We expect subpopulations of VUM neurons to be recruited for the modulation of  
445 asymmetric or other more complex rhythmic or singular muscle activation patterns (e.g. rolling,  
446 turning or hunch behaviors) as already found in other insects (Duch & Pflüger, 1999; Pflüger & Duch,  
447 2011). Furthermore, it would be most interesting to compare larval VUM neuron activity patterns with  
448 patterns of octopaminergic neurons in the adult systems during e.g. walking and flight behavior.

449

#### 450 **Intensity modulation in VUM neuron cluster activity**

451 The absence of successive VUM neuron cluster activity in *in vivo* preparations (animals perceiving  
452 sensory feedback) promotes the idea that it is not essential for the execution of basic crawling  
453 movements but, however, for their modulation. Simultaneous and intensity modulated VUM neuron  
454 activity was induced by body wall stimulation. In the periphery, octopaminergic neurons innervate the  
455 major part of body wall muscles (Monastirioti *et al.*, 1995) where octopamine increases presynaptic  
456 vesicle release (Koon *et al.*, 2011) at neural muscular junctions (NMJs) and contractions directly of

457 body wall muscle fibers/cells (Ormerod *et al.*, 2013). Importantly, the effects are cell selective and  
458 correlate with the distribution of octopamine receptors (El-Kholy *et al.*, 2015) on different muscles  
459 within each body wall segment. Hence, octopamine has an important role as neuromodulator and a  
460 great potential impact on the coordination of different transversal and longitudinal muscles important  
461 for crawling activity (Ormerod *et al.*, 2018). Fox *et al.* (2006) revealed that mutants ( $T\beta h^{nM18}$ ) with a  
462 reduced level of octopamine and an increased level of tyramine exhibit fewer rhythmic neuronal bursts  
463 in motoneurons associated with body wall contraction waves. The same mutant animals lack crawling  
464 speed and make more pauses compared to wild type (Saraswati *et al.*, 2004; Schützler *et al.*, 2019).  
465 Our findings show that activity within the abdominal and thoracic VUM neuron system in the CNS is  
466 synchronous and intensity modulated as, in consequence, should be the octopamine release at NMJs  
467 in the body wall at the periphery. Together these findings suggest that octopamine release is important  
468 1) for the coordination of muscle activity within an individual body segment, and 2) for the  
469 coordination between all body segments since octopamine is released in different intensities  
470 depending on the segment's location. In our study octopamine was only released after physical  
471 stimulation, an event which in the natural environment represent a potential threat to the animal and  
472 should be behaviorally responded to with avoiding behaviors and an increased crawling speed for body  
473 displacement. This hypothesis is confirmed by our open field crawling behavior experiments, in which  
474 contraction frequencies increased after physical stimulations. This is consistent with the idea that  
475 octopamine is released to meet the coordinatively more challenging needs of "high" speed crawling  
476 movements. Conclusions about central and peripheral observations both strengthen our idea of  
477 octopamine as integral part of the pattern generator and modulator which increases muscle  
478 coordination and movement performance over all body segments. Sujkowski *et al.* (2017) reported  
479 that octopaminergic neurons mediate exercise adaptations increasing endurance of e.g. flight and  
480 climbing performances in adult *Drosophila* flies. In this case adaptations were not limited only to  
481 skeletal muscles but also e.g. to cardiac stress resistance. Octopamine mutants are also more  
482 vulnerable to environmental stress (Chentsova *et al.*, 2002) while wildtype flies increase octopamine  
483 levels in response (Hirashima *et al.*, 2000) suggesting that the effects are not only local but also  
484 systemic adapting the whole system to higher performances. Future studies on the effects of  
485 octopamine release like the coordination of muscles and body wall segments in the periphery, as well  
486 as central effects and systemic adaptation are needed to fully evaluate the specific role of octopamine  
487 and other neuromodulators and neuropeptides in larval and adult behavior (Ormerod *et al.*, 2018).

488

#### 489 **VUM neuron responses in multiple trial stimulations**

490 The induction of multiple tactile stimulations of two different intensities changed VUM neuron  
491 response patterns differently over trials. Different intensities of tactile stimulation activated probably

492 two different classes of sensory neurons (class III and IV da neurons) resulting in different VUM neuron  
493 behaviors. Multiple gentle rod stimulations provoked initially an increase in VUM neuron activity after  
494 the first trial which decreased and adapted quickly in consecutive stimulations. However, on a different  
495 time scale this provides a similar effect as found by (Yan *et al.*, 2013) for class III da neurons which  
496 showed a quick adaptation to prolonged gentle touch stimulation. Therefore, the adaptation effect  
497 found in VUM neuron responses is probably caused by sensory input from adapting class III da sensory  
498 neurons. To what degree a downstream network and the VUM neurons themselves are involved in  
499 adaptation effects is unclear and needs further investigation. Harsh brush stimulations provoked  
500 initially a comparable increase in VUM neuron activity, however, after repeated stimulations we found  
501 VUM neuron activity increased rather than decreased. Because of the long livability of increased  
502 calcium levels, we think that brush stimulations are perceived by class IV da sensory neurons sensitive  
503 to noxious stimuli. Long lasting calcium increase indicates a mechanism to down regulate the neuronal  
504 activity threshold and thereby an increase of excitability and sensitivity. Since octopamine release at  
505 the NMJs increases the efficacy of synaptic transmission, a repeated noxious stimulation is responded  
506 by a continual increase of octopamine release, and an ever facilitated transmission at the NMJs.  
507 Additionally, it appears that a repetitive noxious stimulation of constant intensity can result in an  
508 increasing response strength of nociceptive neurons (centrally mediated sensitization) leading to even  
509 stronger escape behaviors after a second or a third noxious stimulation (Walters *et al.*, 2001; Ji *et al.*,  
510 2003; Hu *et al.*, 2017; Tabuena *et al.*, 2017). Such an enhancer effect could be realized not only by  
511 increased sensitivity of nociceptors but also within downstream interneurons or parallel VUM neurons.  
512 Our behavioral data strengthens these interpretations since the same stimulations used to activate the  
513 VUM neuron system in imaging recordings were used to stimulate freely crawling larvae. Responses to  
514 multiple trial gentle rod and harsh brush stimulations followed exactly the same response pattern as  
515 VUM neurons did. Initial stimulations increased crawling frequencies for both kinds of stimulations,  
516 however, after the second and third rod stimulation crawling frequencies decreased whereas  
517 frequencies after brush stimulations increased. The strong correlation of optophysiological and  
518 behavioral data is striking and promotes the idea of a direct link between them.

519

## 520 **Material & Methods**

521 **Animals and dissection.** We used transgenic 3<sup>rd</sup> instar larvae of *Drosophila melanogaster* expressing  
522 the calcium detector GCaMP3.0 in Tdc2 positive neurons (homozygous Tdc2-GAL4/UAS-GCaMP3.0)  
523 allowing optophysiological activity surveillance of tyraminergetic/octopaminergic neurons. GCaMP3 rise  
524 half-life time  $t^{1/2} = 83 \pm 2$  ms; decay half-life time  $t^{1/2}$  or tau  $\tau = 610 \pm 32$  ms (Tian *et al.*, 2009). Flies  
525 were reared at 25°C and raised on standard cornmeal/molasses media, at a 12/12 h light/dark cycle.  
526 For isolated brain imaging experiments larvae were dissected in cooled saline (85 mM NaCl, 20 mM



527 KCl, 4 mM MgCl<sub>2</sub>, 2 mM CaCl<sub>2</sub>, 10 mM HEPES, 20 mM Sucrose in Aqua dest., pH 7.25) using forceps to  
528 extract the CNS from the body. Briefly, we held the larvae in place by one pair of forceps gripping it  
529 halfway down its body length and extracting the CNS by pulling at the mouth hooks with a second pair  
530 of forceps. After cleaning the brain tissue, it was pinned onto a Sylgard dish (Fig. 1A). For *in vivo* imaging  
531 experiments 3<sup>rd</sup> instar larvae were anesthetized on ice before being pinned onto a Sylgard dish using  
532 one pin at the anterior head segment and a second pin at the telson (Fig. 2). In that way body  
533 displacement was restricted to peristaltic muscle contractions typical for larval crawling behavior.  
534 Subsequently, larvae were dissected in cooled saline. For animal dissections a shallow dorsal incision  
535 between the main tracheae was made starting between body segment A3 and A4 and running along  
536 the dorsal midline longitudinally up to the head segment. The left and right body walls were pinned  
537 flat to the bottom of the Sylgard dish. The esophagus, proventriculus and parts of the gut and glands  
538 were removed. The brain lobes, VNC, and segmental nerves were left intact. The Sylgard dish was  
539 transferred to a custom-made acryl glass microscope stage equipped with two micromanipulators  
540 enabling the precise adjustment of tactile stimulators and the ‘microstage’ (Fig. 2A). The microstage,  
541 a small custom-made metal spoon, was put under the VNC and was slightly elevated to minimize  
542 artefacts during body wall stimulation or larval crawling movements. The surface of the spoon was  
543 lacquered matt black to enhance contrast to the whitish transparent color of the VNC. The transparent  
544 microscope stage was further equipped with infrared (IR) LEDs to allow for video recording of larval  
545 movements in darkness from beneath and through the Sylgard dish. For video capturing we used a  
546 CMOS camera (UCMOS 03100 KPA, ToupTek Photonics, Hangzhou, China) with its IR filter removed  
547 and covered by a glass filter blocking wavelengths used for imaging recordings (Fig. 2A).

548

549 **Stimulation.** Mechanical stimulations of the larvae’s body wall were applied by either a paint brush  
550 (round, size 1) or a small metal rod (0.04 cm in diameter) at the anterior or at the posterior body  
551 segments. In imaging experiments the brush was fixed to a rotating servomotor (SM-S2309S)  
552 controlled by an Arduino UNO (microprocessor developer board) which was externally triggered by  
553 imaging software. The brush was positioned laterally to the animal’s body wall (not touching it). When  
554 triggered it was swinging towards the body wall delivering a harsh mechanical (noxious) touch  
555 deflecting the body wall more than 40 μm (Yan *et al.*, 2013). The custom-made rod stimulator was  
556 composed of a miniature loudspeaker (LSM-S20K, EKULIT), to which a blunt metal rod was adhered.  
557 The loudspeaker was connected to an electric pulse generator (SD9 Stimulator, Grass Products,  
558 Warwick, Rhode Island, U.S.A.). By generating rectangular impulses, the diaphragm of the loudspeaker  
559 was vibrating and hence the metal rod was displaced. Intensity and duration of the impulse were  
560 regulated by the stimulator settings. The metal rod was positioned laterally to the animal’s body wall  
561 touching only one body hemisegment. A gentle mechanical touch (deflection of < 40 μm) (Yan *et al.*,

562 2013) was provoked at 100 Volt with a duration of 100ms. Each stimulation consisted of 5 body wall  
563 touches at 5Hz. The pulse generator was externally triggered by imaging software.

564 For pharmacological stimulation of the VUM neuron system we applied 5  $\mu$ l of Pilocarpine ( $10^{-4}$   
565 molar; 0,0244mg/ml) onto the *in vivo* brain dissection. Pilocarpine, a muscarinic agonist which mimics  
566 the action of neurotransmitter acetylcholine by binding muscarinic acetylcholine receptors is not  
567 hydrolyzed by the acetylcholinesterase.

568

569 **Functional *in vivo* calcium ( $Ca^{2+}$ ) imaging.** We used an upright fluorescence microscope, Axioskop FS  
570 (Zeiss, Germany), equipped with a 10x (UMPlanFL 10x/0.30 w), 20x (XLUMPlanFL 20x/0.95 w) and 40x  
571 (LUMPlanFI 40x/0.80 w) water immersion Olympus objective. A Polychrome II (xenon-lamp, 75 W,  
572 Photonics, Planegg/Germany), provided light excitation at 475 nm and a filter set (Omega Optical,  
573 Vermont, USA) ensured passage of only relevant wavelengths (dichromatic mirror: DCLP500, emission  
574 filter: LP515). The emitted light was captured by a 12 bit CCD camera (SensiCam QE, pco.imaging,  
575 Germany) with a symmetrical binning of 4 (1.25x1.25  $\mu$ m/pixel). For imaging measurements, a series  
576 of either 300 or 600 images (henceforth frames; 344x260 pixel) was recorded at 5 or 2 Hz, respectively.  
577 Longtime and low frequency measurements were used for observations without stimulations whereas  
578 short time and high frequency measurements were used for multiple stimulation trials. When  
579 stimulated, three successive stimulations with an inter stimulus interval (ISI) of 20 seconds were  
580 applied at 10, 30 and 50 seconds into the recording (frame 50, 150 and 250, respectively). All imaging  
581 data were analyzed using custom written software in IDL (Interactive Data Language, ITT Visual  
582 Information Solutions). A bleaching correction was applied for each frame by subtracting the median  
583 fluorescence from each pixel. An automated movement correction compensated for movement  
584 artifacts occurring during image sequence recordings. For data acquisition, we set regions of interest  
585 (ROIs) for each identifiable VUM neuron cell body cluster in the ventral nerve cord (VNC) of each  
586 animal. Mean values of each ROI (5x5 pixels per cluster) were calculated in each image (frame) of the  
587 recorded sequence. A data matrix was generated for the fluorescence changes of each identified  
588 cluster over all images (frames) recorded in one sequence. To achieve a comparable standard for the  
589 calculation of the relative fluorescence changes we first calculated the  $\Delta F/F_0$  and defined the  
590 background fluorescence ( $F_0$ ) as the mean of 10 successive frames at the beginning of each recording  
591 (frame 5 - 15). Second, we calculated relative values for  $\Delta F/F_0$  in percent (%) which are plotted in the  
592 figures. For isolated brain imaging experiments each cluster response was normalized to its own  
593 strongest response, meaning that each cluster had a 100% value. Only fluorescence values of cluster  
594 crossing the half maximum threshold (50%) were taken into account for the wave pattern analysis. For  
595 *in vivo* imaging experiments cluster responses were normalized within each animal to its strongest  
596 response (100%) over all identified cluster, meaning that only one cluster had a 100% value.

597 Normalized responses of VUM neuron cell body clusters were compared between test groups using  
598 unpaired t-tests with Welch's correction for unequal variance when needed using statistical software  
599 (Prism, GraphPad Software, La Jolla, California, USA).

600

601 **Behavioral experiments.** The foraging behavior of 3<sup>rd</sup> instar larvae was investigated in glass dishes  
602 (13.5 cm Ø) which were cast using standard agarose (Axon Labortechnik, Kaiserslautern, Germany) in  
603 bidistilled water (2 mg/100 ml). The crawling events during normal foraging behavior and stimulus  
604 induced escape response of the animals were counted and their frequencies analyzed. Observations  
605 and mechanical stimulations were done at 26-27°C. For brush or rod stimulations either a handhold  
606 brush or a handhold rod stimulator (triggered by hand at the pulse generator) was used to stimulate  
607 the posterior end of the larvae. Quiescent animals or animals showing freezing or rolling behavior after  
608 mechanical stimulations were excluded from the analysis. Each experimental run started with the  
609 observation of the unstimulated foraging behavior during 20 seconds followed by the first stimulation.  
610 In total three successive stimulations with an ISI of 20 seconds were applied at 20, 40 and 60 seconds  
611 into the experimental run. After each stimulation the crawling events during 20 seconds were counted.  
612 For comparisons between different experimental groups a crawling index was calculated by dividing  
613 the number of crawling events after each stimulation through the number of crawling events of  
614 unstimulated animals before the first stimulation,

$$\text{crawling index (CI)} = \frac{\text{crawling frequency after stimulation } i}{\text{crawling frequency before stimulation}}$$

615

616 For correlation analysis between calcium imaging measurements and the behavioral performances we  
617 did linear regression analysis and calculated Pearson's correlation coefficients (Fig. 4B).

618

619 **Immunohistochemical staining and confocal imaging.** To visualize peripheral VUM neuron projections  
620 and innervation of body wall muscles in relation to neuronal muscular junctions (Fig. 4A) 3<sup>rd</sup> instar  
621 larvae of Tdc2-GAL4/UAS-GCaMP3.0 flies were pinned on Sylgard dishes as described above. All organs  
622 were removed, and the body wall was fixed at six points using Minutien pins. The tissue was fixed for  
623 10 minutes in 4% PFA (diluted in 0.1 M PBS), rinsed and washed several times in 0.1 M PBS-0.3% Triton  
624 X (PBS-Tx) and blocked 30 minutes in 10% normal goat serum (NGS, diluted in PBS-Tx). The blocking  
625 solution was exchanged with antiserum solution: rabbit-anti-GFP (Abcam 290, 1:1000) and mouse-  
626 anti-highwire (DSHB #6H4, 1:100) in 10% NGS. Tissue was incubated overnight at 4°C, washed 3 x 10  
627 minutes in PBS-Tx and incubated for 2 hours (at room temperature) in second antiserum solution:  
628 goat-anti-rabbit-Alexa 488 (Invitrogen A-11008), goat-anti-mouse-Alexa 647 (Invitrogen A-21236) and  
629 Phalloidin-Alexa 594 (Invitrogen A12381). Tissue was washed in PBS and mounted in Vectashield (H-  
630 1000, Burlingame, Ca). To analyze central thoracic and abdominal VUM clusters (Suppl. Fig. 2A) larval

631 brains (Tdc2-GAL4/UAS-GCaMP3.0) were dissected, fixed, washed and mounted in vectashield.  
632 Samples were stored at 4°C until being imaged with a Leica DMI8 CEL SP8 confocal microscope, 8-bit,  
633 0.3 mm voxel depth (1.024 x 1.024 px). A 63x/1.40 HC PL APO Oil CS2 WD 0.14 mm objective was used.  
634 Images were processed with the freeware imaging software FIJI (Schindelin *et al.*, 2012) and the Leica  
635 Application Suite (LAS) X 3D analysis software.

636

## 637 **Author contributions**

638 H.-J.P. and M.S. planned and designed the experiments. M.S., F.B. and M.-M.G. conducted functional  
639 calcium imaging experiments. A.S. performed confocal imaging. M.S., F.B. and M.-M.G. analyzed the  
640 data. H.-J.P. and M.S. drafted the manuscript.

641

## 642 **Acknowledgments**

643 We express our gratitude to Heike Wolfenber for excellent technical assistance and we thank Prof.  
644 Dr. Björn Brembs and Dr. Christine Damrau for providing fly lines. We thank Prof. Dr. Robin Hiesinger  
645 and Prof. Dr. Mathias Wernet for valuable discussion on the project. This work was supported by the  
646 German Federal Ministry of Education and Research (BMBF) through grant 01GQ1001D to the  
647 Bernstein Center for Computational Neuroscience Berlin.

648

## 649 **References**

650

651 Arikawa, K., Washio, H. & Tanaka, Y. (1984) Dorsal unpaired median neurons of the cockroach  
652 metathoracic ganglion. *J Neurobiol*, **15**, 531-536.

653

654 Baier, A., Wittek, B. & Brembs, B. (2002) Drosophila as a new model organism for the neurobiology of  
655 aggression? *J Exp Biol*, **205**, 1233-1240.

656

657 Bässler, U. (1986) On the definition of central pattern generator and its sensory control. *Biological*  
658 *Cybernetics*, **54**, 65-69.

659

660 Baudoux, S. & Burrows, M. (1998) Synaptic activation of efferent neuromodulatory neurones in the  
661 locust *Schistocerca gregaria*. *J Exp Biol*, **201**, 3339-3354.

662

663 Baudoux, S., Duch, C. & Morris, O.T. (1998) *Coupling of Efferent Neuromodulatory Neurons to*  
664 *Rhythmical Leg Motor Activity in the Locust*.

665

666 Berni, J., Pulver, S.R., Griffith, L.C. & Bate, M. (2012) Autonomous circuitry for substrate exploration in  
667 freely moving *Drosophila* larvae. *Curr Biol*, **22**, 1861-1870.

668

- 669 Bräunig, P. & Pflüger, H.-J. (2001) The unpaired median neurons of insects *Advances in Insect*  
670 *Physiology*. Academic Press, pp. 185-182.
- 671
- 672 Brembs, B., Christiansen, F., Pflüger, H.J. & Duch, C. (2007) Flight initiation and maintenance deficits in  
673 flies with genetically altered biogenic amine levels. *Journal of Neuroscience*, **27**, 11122-11131.
- 674
- 675 Burrows, M. & Pflüger, H.J. (1995) Action of locust neuromodulatory neurons is coupled to specific  
676 motor patterns. *J Neurophysiol*, **74**, 347-357.
- 677
- 678 Busch, S., Selcho, M., Ito, K. & Tanimoto, H. (2009) A Map of Octopaminergic Neurons in the Drosophila  
679 Brain. *Journal of Comparative Neurology*, **513**, 643-667.
- 680
- 681 Busch, S. & Tanimoto, H. (2010) Cellular configuration of single octopamine neurons in Drosophila.  
682 *Journal of Comparative Neurology*, **518**, 2355-2364.
- 683
- 684 Büschges, A., Schmitz, J. & Bässler, U. (1995) Rhythmic Patterns in the Thoracic Nerve Cord of the Stick  
685 Insect Induced by Pilocarpine. *Journal of Experimental Biology*, **198**, 435-456.
- 686
- 687 Candy, D.J. (1978) Regulation of Locust Flight-Muscle Metabolism by Octopamine and Other  
688 Compounds. *Insect Biochem*, **8**, 177-181.
- 689
- 690 Chentsova, N.A., Gruntenko, N.E., Bogomolova, E.V., Adonyeva, N.V., Karpova, E.K. & Rauschenbach,  
691 I.Y. (2002) Stress response in Drosophila melanogaster strain inactive with decreased tyramine  
692 and octopamine contents. *J Comp Physiol B*, **172**, 643-650.
- 693
- 694 Crisp, S., Evers, J.F., Fiala, A. & Bate, M. (2008) The development of motor coordination in Drosophila  
695 embryos. *Development*, **135**, 3707-3717.
- 696
- 697 Crossman, A.R., Kerkut, G.A. & Walker, R.J. (1971) Axon pathways of electrically excitable nerve cell  
698 bodies in the insect central nervous system. *J Physiol*, **218 Suppl**, 55P-56P.
- 699
- 700 Dixit, R., Vijayraghavan, K. & Bate, M. (2008) Hox genes and the regulation of movement in Drosophila.  
701 *Dev Neurobiol*, **68**, 309-316.
- 702
- 703 Duch, C., Mentel, T. & Pflüger, H.J. (1999) Distribution and activation of different types of  
704 octopaminergic DUM neurons in the locust. *J Comp Neurol*, **403**, 119-134.
- 705
- 706 Duch, C. & Pflüger, H.J. (1999) DUM neurons in locust flight: a model system for amine-mediated  
707 peripheral adjustments to the requirements of a central motor program. *J Comp Physiol A*,  
708 **184**, 489-499.
- 709
- 710 El-Kholy, S., Stephano, F., Li, Y., Bhandari, A., Fink, C. & Roeder, T. (2015) Expression analysis of  
711 octopamine and tyramine receptors in Drosophila. *Cell Tissue Res*, 1-16.
- 712



- 713 Erspamer, V. (1948) Active Substances in the Posterior Salivary Glands of Octopoda .2. Tyramine and  
714 Octopamine (Oxyoctopamine). *Acta Pharmacol Tox*, **4**, 224-247.
- 715  
716 Farooqui, T. (2012) Review of octopamine in insect nervous systems. *Open Access Insect Physiol*, **4**, 1-  
717 17.
- 718  
719 Fox, L.E., Soll, D.R. & Wu, C.F. (2006) Coordination and modulation of locomotion pattern generators  
720 in *Drosophila* larvae: effects of altered biogenic amine levels by the tyramine beta hydroxlyase  
721 mutation. *J Neurosci*, **26**, 1486-1498.
- 722  
723 Fussnecker, B.L., Smith, B.H. & Mustard, J.A. (2006) Octopamine and tyramine influence the behavioral  
724 profile of locomotor activity in the honey bee (*Apis mellifera*). *J Insect Physiol*, **52**, 1083-1092.
- 725  
726 Gomez-Marin, A. & Louis, M. (2012) Active sensation during orientation behavior in the *Drosophila*  
727 larva: more sense than luck. *Curr Opin Neurobiol*, **22**, 208-215.
- 728  
729 Green, C.H., Burnet, B. & Connolly, K.J. (1983) Organization and patterns of inter- and intraspecific  
730 variation in the behaviour of *Drosophila* larvae. *Animal Behaviour*, **31**, 282-291.
- 731  
732 Hammer, M. (1993) An identified neuron mediates the unconditioned stimulus in associative olfactory  
733 learning in honeybees. *Nature*, **366**, 59-63.
- 734  
735 Hammer, M. & Menzel, R. (1998) Multiple sites of associative odor learning as revealed by local brain  
736 microinjections of octopamine in honeybees. *Learn Mem*, **5**, 146-156.
- 737  
738 Heckscher, E.S., Lockery, S.R. & Doe, C.Q. (2012) Characterization of *Drosophila* larval crawling at the  
739 level of organism, segment, and somatic body wall musculature. *J Neurosci*, **32**, 12460-12471.
- 740  
741 Hirashima, A., Sukhanova, M. & Rauschenbach, I. (2000) Genetic control of biogenic-amine systems in  
742 *Drosophila* under normal and stress conditions. *Biochem Genet*, **38**, 167-180.
- 743  
744 Hoyer, S.C., Eckart, A., Herrel, A., Zars, T., Fischer, S.A., Hardie, S.L. & Heisenberg, M. (2008)  
745 Octopamine in male aggression of *Drosophila*. *Curr Biol*, **18**, 159-167.
- 746  
747 Hoyle, G. (1974) Function for Neurons (Dum) Neurosecretory on Skeletal-Muscle of Insects. *J Exp Zool*,  
748 **189**, 401-406.
- 749  
750 Hoyle, G. (1975) Evidence that insect dorsal unpaired median (DUM) neurons are octopaminergic. *J*  
751 *Exp Zool*, **193**, 425-431.
- 752  
753 Hoyle, G. & Dagan, D. (1978) Physiological Characteristics and Reflex Activation of Dum  
754 (Octopaminergic) Neurons of Locust Metathoracic Ganglion. *J Neurobiol*, **9**, 59-79.
- 755

- 756 Hu, C., Petersen, M., Hoyer, N., Spitzweck, B., Tenedini, F., Wang, D., Gruschka, A., Burchardt, L.S.,  
757 Szpotowicz, E., Schweizer, M., Guntur, A.R., Yang, C.H. & Soba, P. (2017) Sensory integration  
758 and neuromodulatory feedback facilitate *Drosophila* mechanonociceptive behavior. *Nat*  
759 *Neurosci*, **20**, 1085-1095.
- 760  
761 Ji, R.-R., Kohno, T., Moore, K.A. & Woolf, C.J. (2003) Central sensitization and LTP: do pain and memory  
762 share similar mechanisms? *Trends in Neurosciences*, **26**, 696-705.
- 763  
764 Johnston, R.M., Consoulas, C., Pflüger, H. & Levine, R.B. (1999) Patterned activation of unpaired median  
765 neurons during fictive crawling in *manduca sexta* larvae. *J Exp Biol*, **202 (Pt 2)**, 103-113.
- 766  
767 Johnston, R.M. & Levine, R.B. (1996) Crawling motor patterns induced by pilocarpine in isolated larval  
768 nerve cords of *Manduca sexta*. *J Neurophysiol*, **76**, 3178-3195.
- 769  
770 Kononenko, N.L. & Pflüger, H.J. (2007) Dendritic projections of different types of octopaminergic  
771 unpaired median neurons in the locust metathoracic ganglion. *Cell Tissue Res*, **330**, 179-195.
- 772  
773 Koon, A.C., Ashley, J., Barria, R., DasGupta, S., Brain, R., Waddell, S., Alkema, M.J. & Budnik, V. (2011)  
774 Autoregulatory and paracrine control of synaptic and behavioral plasticity by octopaminergic  
775 signaling. *Nat Neurosci*, **14**, 190-199.
- 776  
777 Koon, A.C. & Budnik, V. (2012) Inhibitory control of synaptic and behavioral plasticity by  
778 octopaminergic signaling. *J Neurosci*, **32**, 6312-6322.
- 779  
780 Lahiri, S., Shen, K., Klein, M., Tang, A., Kane, E., Gershow, M., Garrity, P. & Samuel, A.D. (2011) Two  
781 alternating motor programs drive navigation in *Drosophila* larva. *PLoS One*, **6**, e23180.
- 782  
783 Mentel, T., Duch, C., Stypa, H., Wegener, G., Müller, U. & Pflüger, H.-J. (2003) Central modulatory  
784 neurons control fuel selection in flight muscle of migratory locust. *The Journal of neuroscience*  
785 : *the official journal of the Society for Neuroscience*, **23**, 1109-1113.
- 786  
787 Mentel, T., Weiler, V., Buschges, A. & Pflüger, H.J. (2008) Activity of neuromodulatory neurones during  
788 stepping of a single insect leg. *J Insect Physiol*, **54**, 51-61.
- 789  
790 Monastirioti, M. (1999) Biogenic amine systems in the fruit fly *Drosophila melanogaster*. *Microsc Res*  
791 *Tech*, **45**, 106-121.
- 792  
793 Monastirioti, M., Gorczyca, M., Rapus, J., Eckert, M., White, K. & Budnik, V. (1995) Octopamine  
794 immunoreactivity in the fruit fly *Drosophila melanogaster*. *J Comp Neurol*, **356**, 275-287.
- 795  
796 Orchard, I. & Lange, A.B. (1986) Neuromuscular-Transmission in an Insect Visceral Muscle. *J Neurobiol*,  
797 **17**, 359-372.
- 798  
799 Ormerod, K.G., Hadden, J.K., Deady, L.D., Mercier, A.J. & Krans, J.L. (2013) *Action of octopamine and*  
800 *tyramine on muscles of Drosophila melanogaster larvae.*

- 801  
802 Ormerod, K.G., Jung, J. & Mercier, A.J. (2018) Modulation of neuromuscular synapses and contraction  
803 in *Drosophila* 3rd instar larvae. *J Neurogenet*, **32**, 183-194.
- 804  
805 Papaefthymiou, C. & Theophilidis, G. (2001) An in vitro method for recording the electrical activity of  
806 the isolated heart of the adult *Drosophila melanogaster*. *In Vitro Cell Dev Biol Anim*, **37**, 445-  
807 449.
- 808  
809 Pauls, D., Blechschmidt, C., Frantzman, F., el Jundi, B. & Selcho, M. (2018) A comprehensive  
810 anatomical map of the peripheral octopaminergic/tyraminerbic system of *Drosophila*  
811 *melanogaster*. *Scientific Reports*, **8**, 15314.
- 812  
813 Pflüger, H.J. & Duch, C. (2011) Dynamic neural control of insect muscle metabolism related to motor  
814 behavior. *Physiology (Bethesda)*, **26**, 293-303.
- 815  
816 Plotnikova, S. (1969) Effector neurons with several axons in the ventral nerve cord of the Asian  
817 grasshopper *Locusta migratoria*. *J Evol Biochem Physiol*, **5**, 276-277.
- 818  
819 Pulver, S.R., Bayley, T.G., Taylor, A.L., Berni, J., Bate, M. & Hedwig, B. (2015) Imaging fictive locomotor  
820 patterns in larval *Drosophila*. *J Neurophysiol*, **114**, 2564-2577.
- 821  
822 Roeder, T. (2005) Tyramine and octopamine: ruling behavior and metabolism. *Annu Rev Entomol*, **50**,  
823 447-477.
- 824  
825 Roeder, T., Seifert, M., Kahler, C. & Gewecke, M. (2003) Tyramine and octopamine: antagonistic  
826 modulators of behavior and metabolism. *Arch Insect Biochem Physiol*, **54**, 1-13.
- 827  
828 Ryckebusch, S. & Laurent, G. (1993) Rhythmic patterns evoked in locust leg motor neurons by the  
829 muscarinic agonist pilocarpine. *J Neurophysiol*, **69**, 1583-1595.
- 830  
831 Saraswati, S., Fox, L.E., Soll, D.R. & Wu, C.F. (2004) Tyramine and octopamine have opposite effects on  
832 the locomotion of *Drosophila* larvae. *J Neurobiol*, **58**, 425-441.
- 833  
834 Scheiner, R., Baumann, A. & Blenau, W. (2006) Aminergic control and modulation of honeybee  
835 behaviour. *Curr Neuropharmacol*, **4**, 259-276.
- 836  
837 Schindelin, J., Arganda-Carreras, I., Frise, E., Kaynig, V., Longair, M., Pietzsch, T., Preibisch, S., Rueden,  
838 C., Saalfeld, S., Schmid, B., Tinevez, J.-Y., White, D.J., Hartenstein, V., Eliceiri, K., Tomancak, P.  
839 & Cardona, A. (2012) Fiji: an open-source platform for biological-image analysis. *Nature*  
840 *Methods*, **9**, 676.
- 841  
842 Schroll, C., Riemensperger, T., Bucher, D., Ehmer, J., Voller, T., Erbguth, K., Gerber, B., Hendel, T., Nagel,  
843 G., Buchner, E. & Fiala, A. (2006) Light-induced activation of distinct modulatory neurons  
844 triggers appetitive or aversive learning in *Drosophila* larvae. *Curr Biol*, **16**, 1741-1747.
- 845

- 846 Schützler, N., Girwert, C., Hügli, I., Mohana, G., Roignant, J.-Y., Ryglewski, S. & Duch, C. (2019) Tyramine  
847 action on motoneuron excitability and adaptable tyramine/octopamine ratios adjust  
848 *Drosophila* locomotion to nutritional state. *Proceedings of the National Academy of Sciences*,  
849 **116**, 3805-3810.
- 850  
851 Selcho, M., Pauls, D., El Jundi, B., Stocker, R.F. & Thum, A.S. (2012) The role of octopamine and tyramine  
852 in *Drosophila* larval locomotion. *J Comp Neurol*, **520**, 3764-3785.
- 853  
854 Selcho, M., Pauls, D., Huser, A., Stocker, R.F. & Thum, A.S. (2014) Characterization of the  
855 octopaminergic and tyraminergetic neurons in the central brain of *Drosophila* larvae. *J Comp*  
856 *Neurol*, **522**, 3485-3500.
- 857  
858 Sombati, S. & Hoyle, G. (1984) Generation of specific behaviors in a locust by local release into neuropil  
859 of the natural neuromodulator octopamine. *J Neurobiol*, **15**, 481-506.
- 860  
861 Song, W., Onishi, M., Jan, L.Y. & Jan, Y.N. (2007) Peripheral multidendritic sensory neurons are  
862 necessary for rhythmic locomotion behavior in *Drosophila* larvae. *Proc Natl Acad Sci U S A*,  
863 **104**, 5199-5204.
- 864  
865 Stevenson, P.A., Dyakonova, V., Rillich, J. & Schildberger, K. (2005) Octopamine and experience-  
866 dependent modulation of aggression in crickets. *J Neurosci*, **25**, 1431-1441.
- 867  
868 Stolz, T., Diesner, M., Neupert, S., Hess, M.E., Delgado-Betancourt, E., Pflüger, H.-J. & Schmidt, J. (2019)  
869 Descending octopaminergic neurons modulate sensory-evoked activity of thoracic motor  
870 neurons in stick insects. *Journal of Neurophysiology*, **122**, 2388-2413.
- 871  
872 Sujkowski, A., Ramesh, D., Brockmann, A. & Wessells, R. (2017) Octopamine Drives Endurance Exercise  
873 Adaptations in *Drosophila*. *Cell Rep*, **21**, 1809-1823.
- 874  
875 Suo, S., Culotti, J.G. & Van Tol, H.H. (2009) Dopamine counteracts octopamine signalling in a neural  
876 circuit mediating food response in *C. elegans*. *EMBO J*, **28**, 2437-2448.
- 877  
878 Tabuena, D.R., Solis, A., Geraldini, K., Moffatt, C.A. & Fuse, M. (2017) Central neural alterations  
879 predominate in an insect model of nociceptive sensitization. *Journal of Comparative*  
880 *Neurology*, **525**, 1176-1191.
- 881  
882 Tian, L., Hires, S.A., Mao, T., Huber, D., Chiappe, M.E., Chalasani, S.H., Petreanu, L., Akerboom, J.,  
883 McKinney, S.A., Schreiter, E.R., Bargmann, C.I., Jayaraman, V., Svoboda, K. & Looger, L.L. (2009)  
884 Imaging neural activity in worms, flies and mice with improved GCaMP calcium indicators. *Nat*  
885 *Methods*, **6**, 875-881.
- 886  
887 Vömel, M. & Wegener, C. (2008) Neuroarchitecture of aminergic systems in the larval ventral ganglion  
888 of *Drosophila melanogaster*. *PLoS One*, **3**, e1848.
- 889  
890 Waddell, S. (2013) Reinforcement signalling in *Drosophila*; dopamine does it all after all. *Curr Opin*  
891 *Neurobiol*, **23**, 324-329.

892  
893 Walters, E., Illich, P., Weeks, J. & Lewin, M. (2001) Defensive responses of larval *Manduca sexta* and  
894 their sensitization by noxious stimuli in the laboratory and field. *Journal of Experimental*  
895 *Biology*, **204**, 457-469.

896  
897 Walther, C. & Zittlau, K.E. (1998) Resting membrane properties of locust muscle and their modulation  
898 II. Actions of the biogenic amine octopamine. *J Neurophysiol*, **80**, 785-797.

899  
900 Watson, A.H. (1984) The dorsal unpaired median neurons of the locust metathoracic ganglion:  
901 neuronal structure and diversity, and synapse distribution. *J Neurocytol*, **13**, 303-327.

902  
903 Wicher, D. (2007) Metabolic regulation and behavior: how hunger produces arousal - an insect study.  
904 *Endocr Metab Immune Disord Drug Targets*, **7**, 304-310.

905  
906 Xiang, Y., Yuan, Q., Vogt, N., Looger, L.L., Jan, L.Y. & Jan, Y.N. (2010) Light-avoidance-mediating  
907 photoreceptors tile the *Drosophila* larval body wall. *Nature*, **468**, 921-926.

908  
909 Yan, Z., Zhang, W., He, Y., Gorczyca, D., Xiang, Y., Cheng, L.E., Meltzer, S., Jan, L.Y. & Jan, Y.N. (2013)  
910 *Drosophila* NOMPC is a mechanotransduction channel subunit for gentle-touch sensation.  
911 *Nature*, **493**, 221-225.

912  
913 Zeng, H., Loughton, B.G. & Jennings, K.R. (1996) Tissue specific transduction systems for octopamine  
914 in the locust (*Locusta migratoria*). *J Insect Physiol*, **42**, 765-769.

915  
916 Zhou, C., Rao, Y. & Rao, Y. (2008) A subset of octopaminergic neurons are important for *Drosophila*  
917 aggression. *Nature Neuroscience*, **11**, 1059-1067.

918  
919  
920
